# Supplementary material
Source: PubMed Central journal article supplement (PMC7895854)
Supplement: NIHMS1623232-supplement-1.pdf [file NIHMS1623232-supplement-1.pdf]

## Supplemental Figures and Tables

### Supplemental Figure 1.

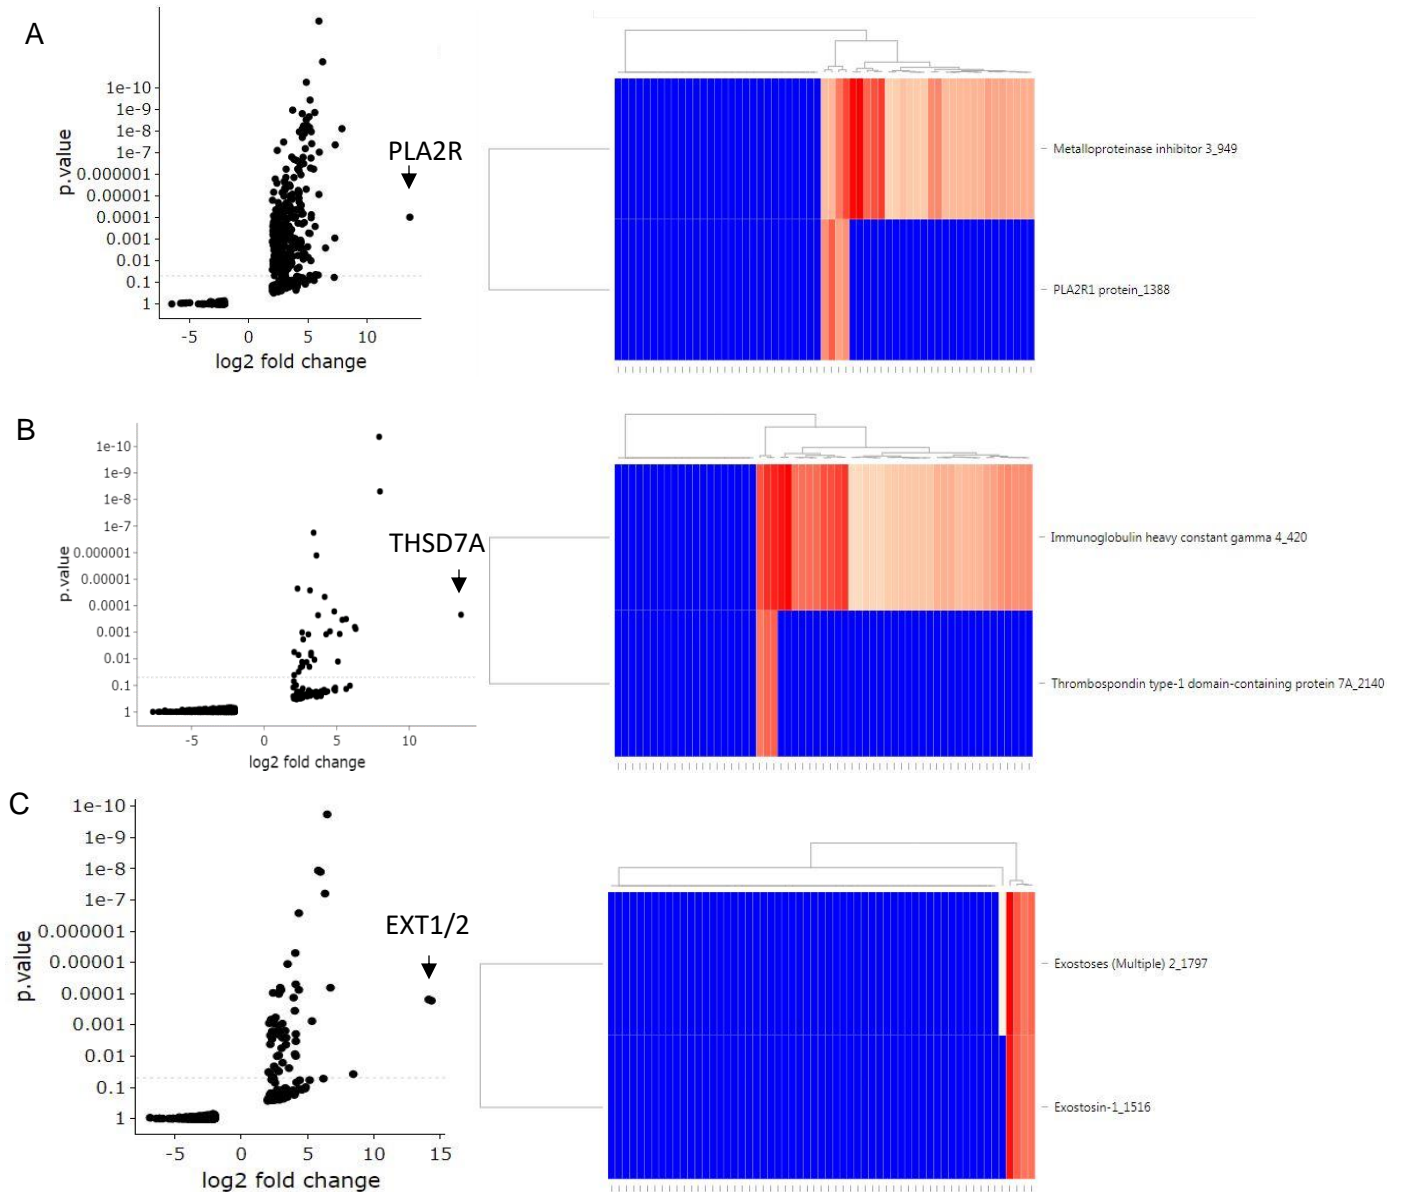

**Supplemental Figure 1.** Proof-of-principle mass spectrometry analysis, showing tissue IgG immunoprecipitation correctly identified the target antigens within glomeruli in known cases of membranous nephropathy, including PLA2R (A), THSD7A (B), and the EXT1/2 complex (C).

**Supplemental Figure 2.**

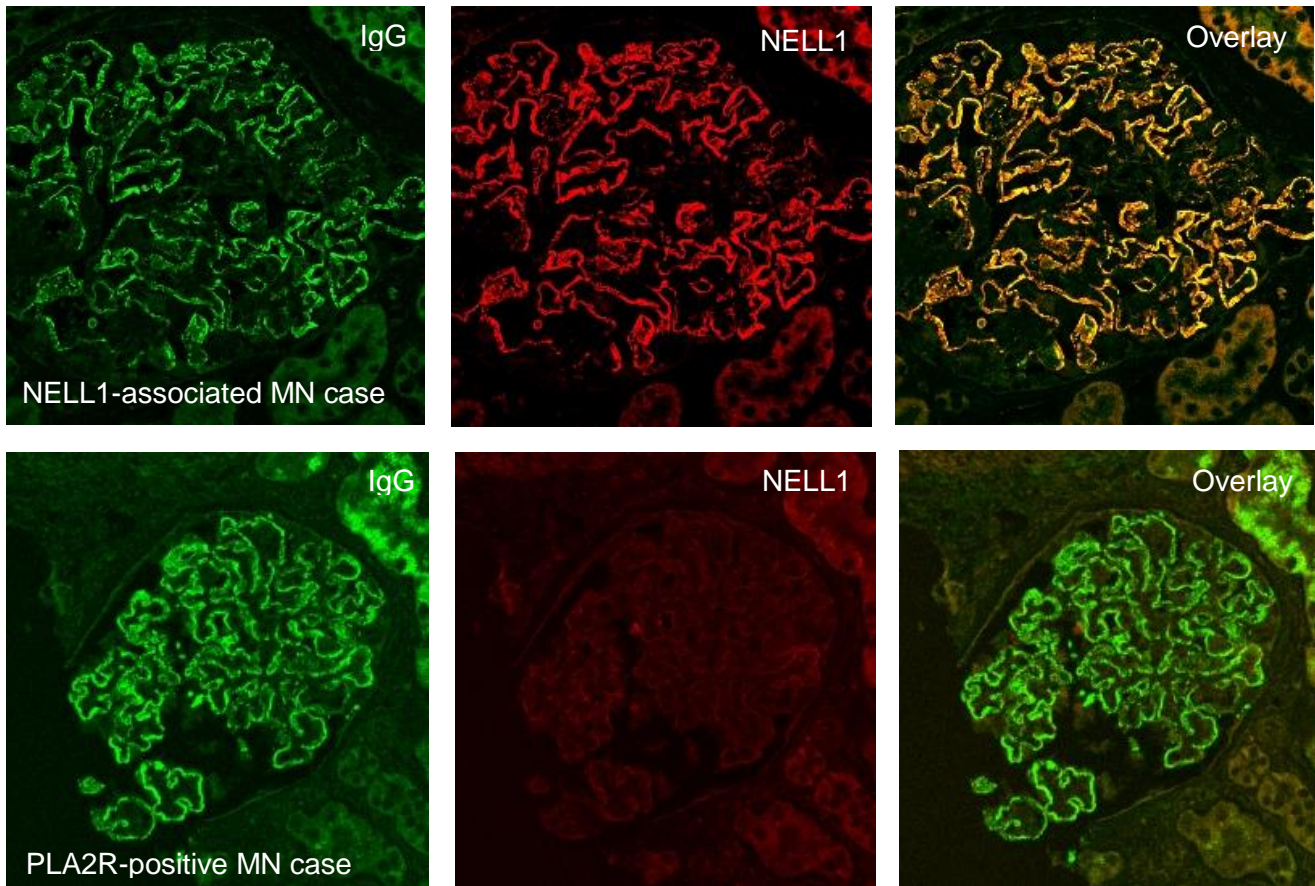

**Supplemental Figure 2.** NELL1 co-localizes with IgG in NELL1-associated MN cases (top panels), but not in PLA2R-positive MN controls (bottom panels).

Supplemental Figure 3.

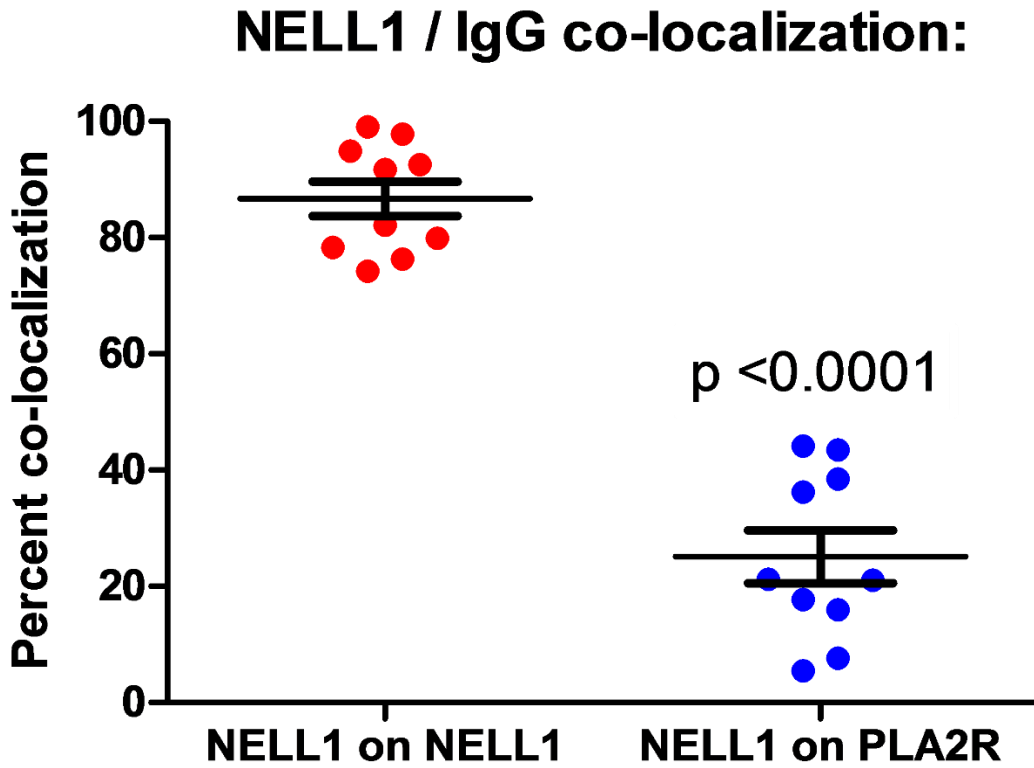

**Supplemental Figure 3.** NELL1 co-localizes with IgG in NELL1-associated MN cases, but not PLA2R-positive MN controls. Results represent 10 glomeruli per group. p-value represents student's t-test.

**Supplemental Figure 4.**

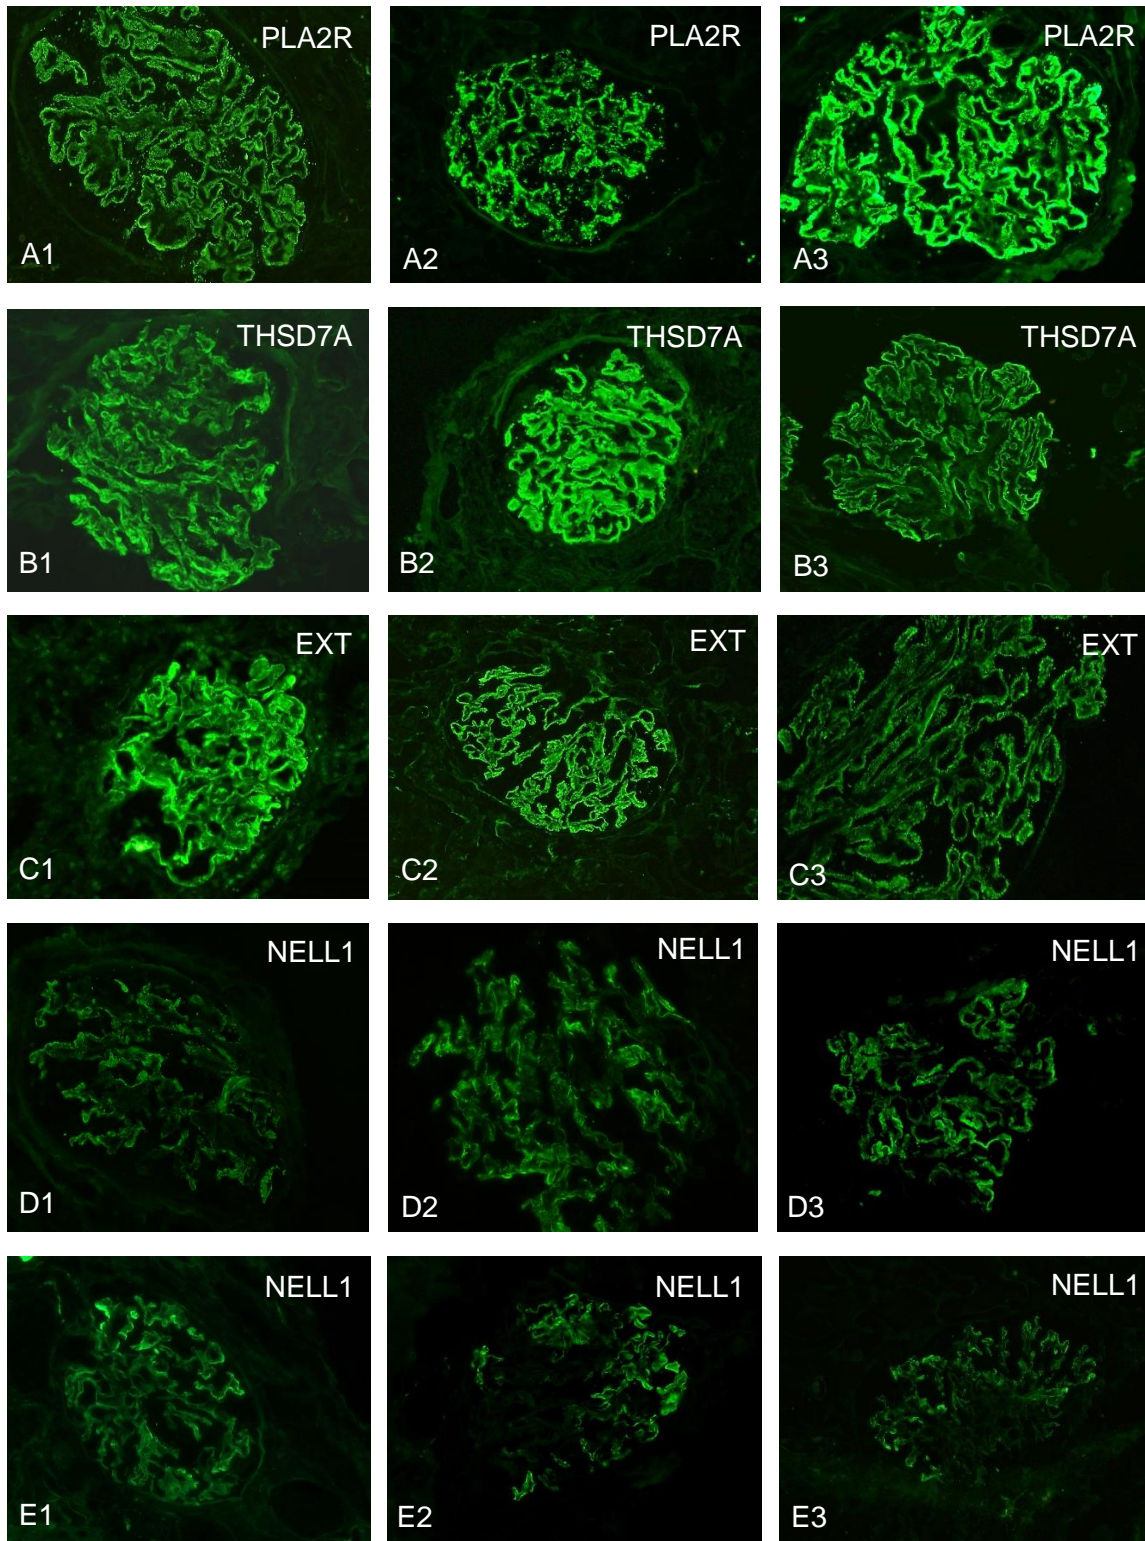

**Supplemental Figure 4.** IgG immunofluorescence staining shows a complete, global staining pattern in PLA2R-positive MN (A1-A3); IgG immunofluorescence staining shows a complete, global staining pattern in THSD7A-positive MN (B1-B3); EXT-associated MN contained global capillary loop and often mesangial staining for IgG (C1-C3); NELL1-associated MN displays incomplete global (D1-D3) to segmental (E1-E3) capillary loop staining for IgG.

## Supplemental Figure 5.

### A. Incomplete global staining pattern

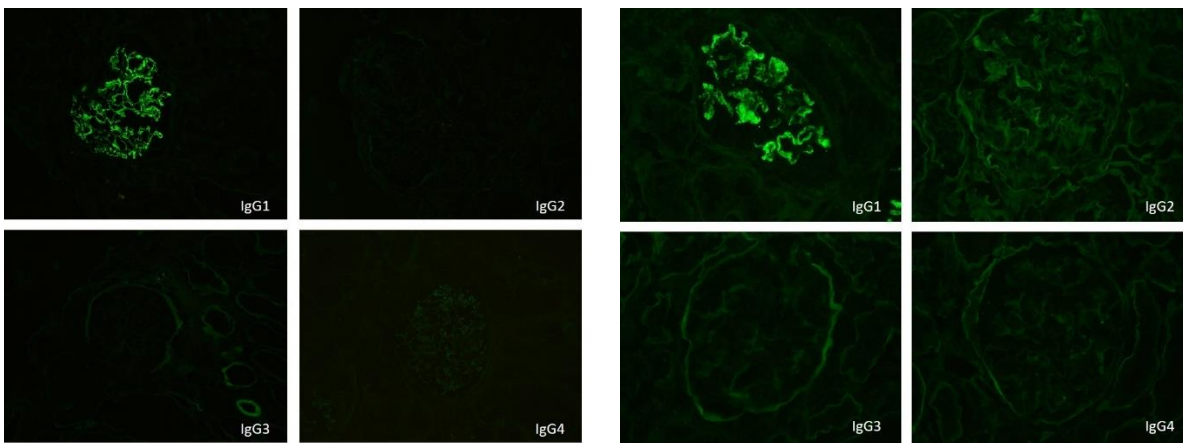

### B. Segmental staining pattern

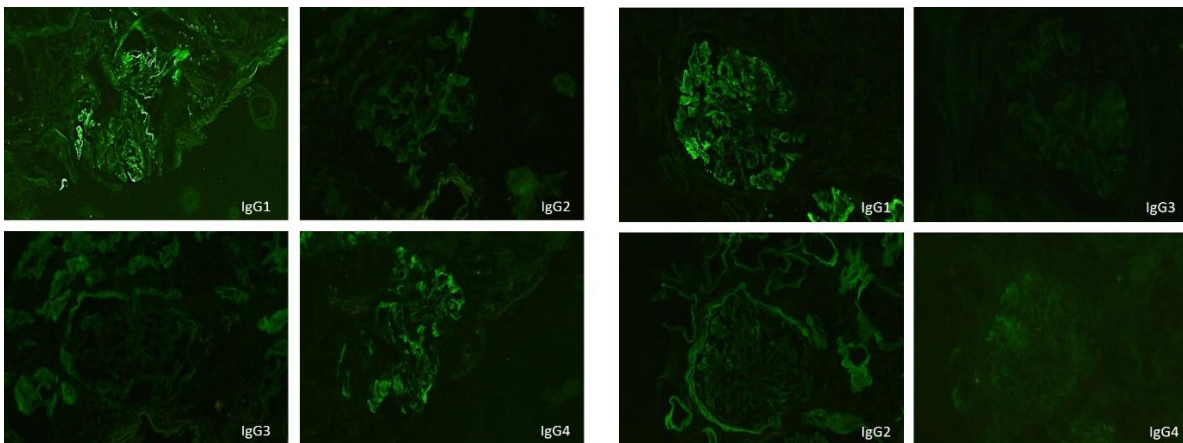

### C. Complete global staining pattern

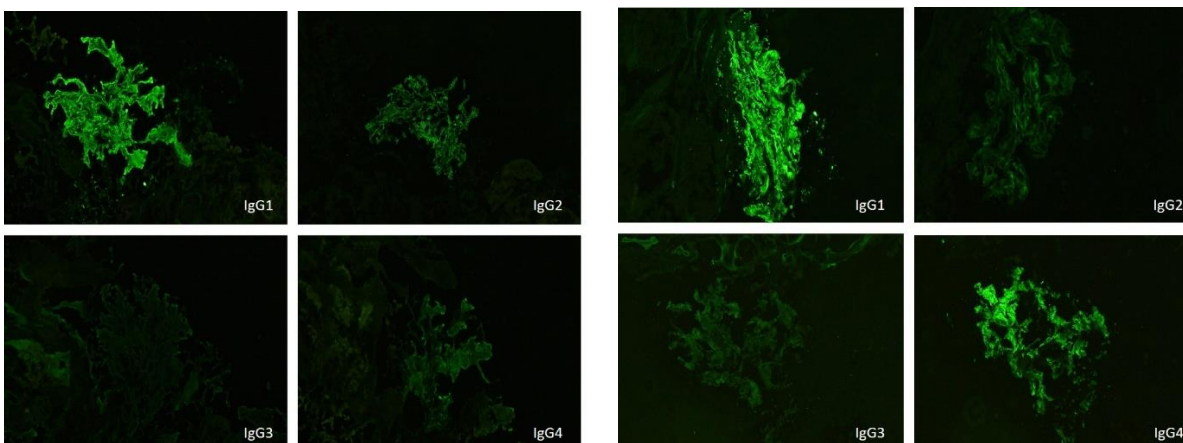

**Supplemental Figure 5.** Additional examples of IgG subclass staining. A) Two cases with an incomplete global staining pattern, B) Two cases with a segmental IgG staining pattern, C) Two cases with a complete global IgG staining pattern.

**Supplemental Figure 6.**

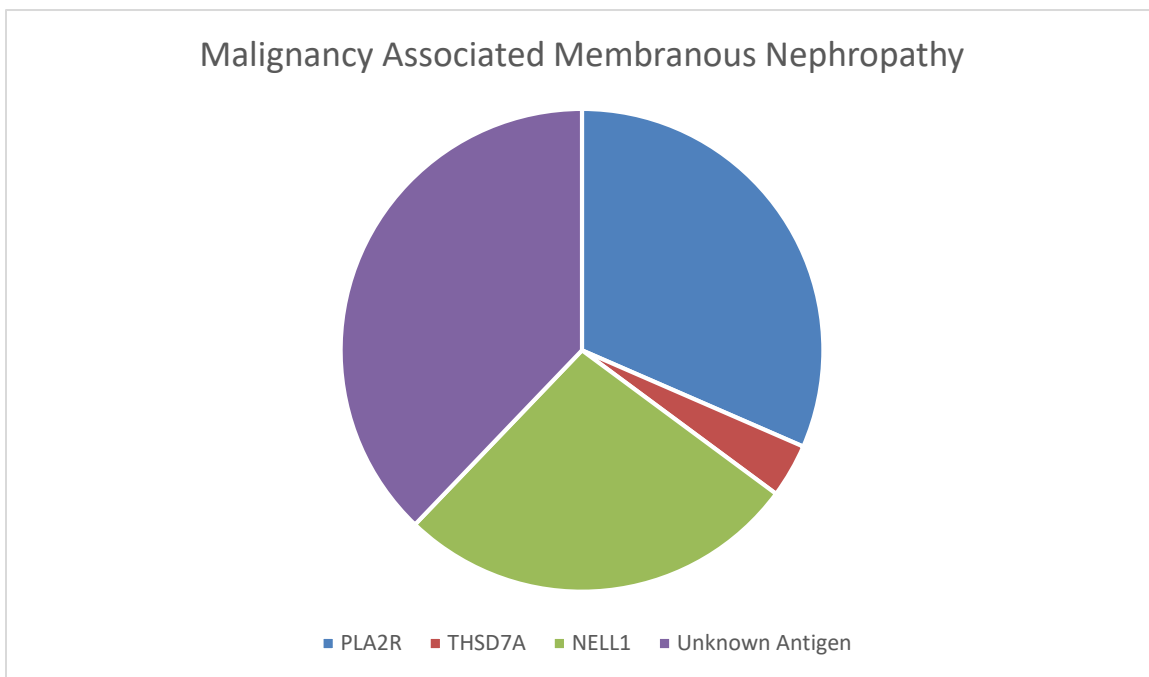

**Supplemental Figure 6.** Pie graph depicting frequencies of antigen expression in malignancy-associated membranous nephropathy.

**Supplemental Figure 7.**

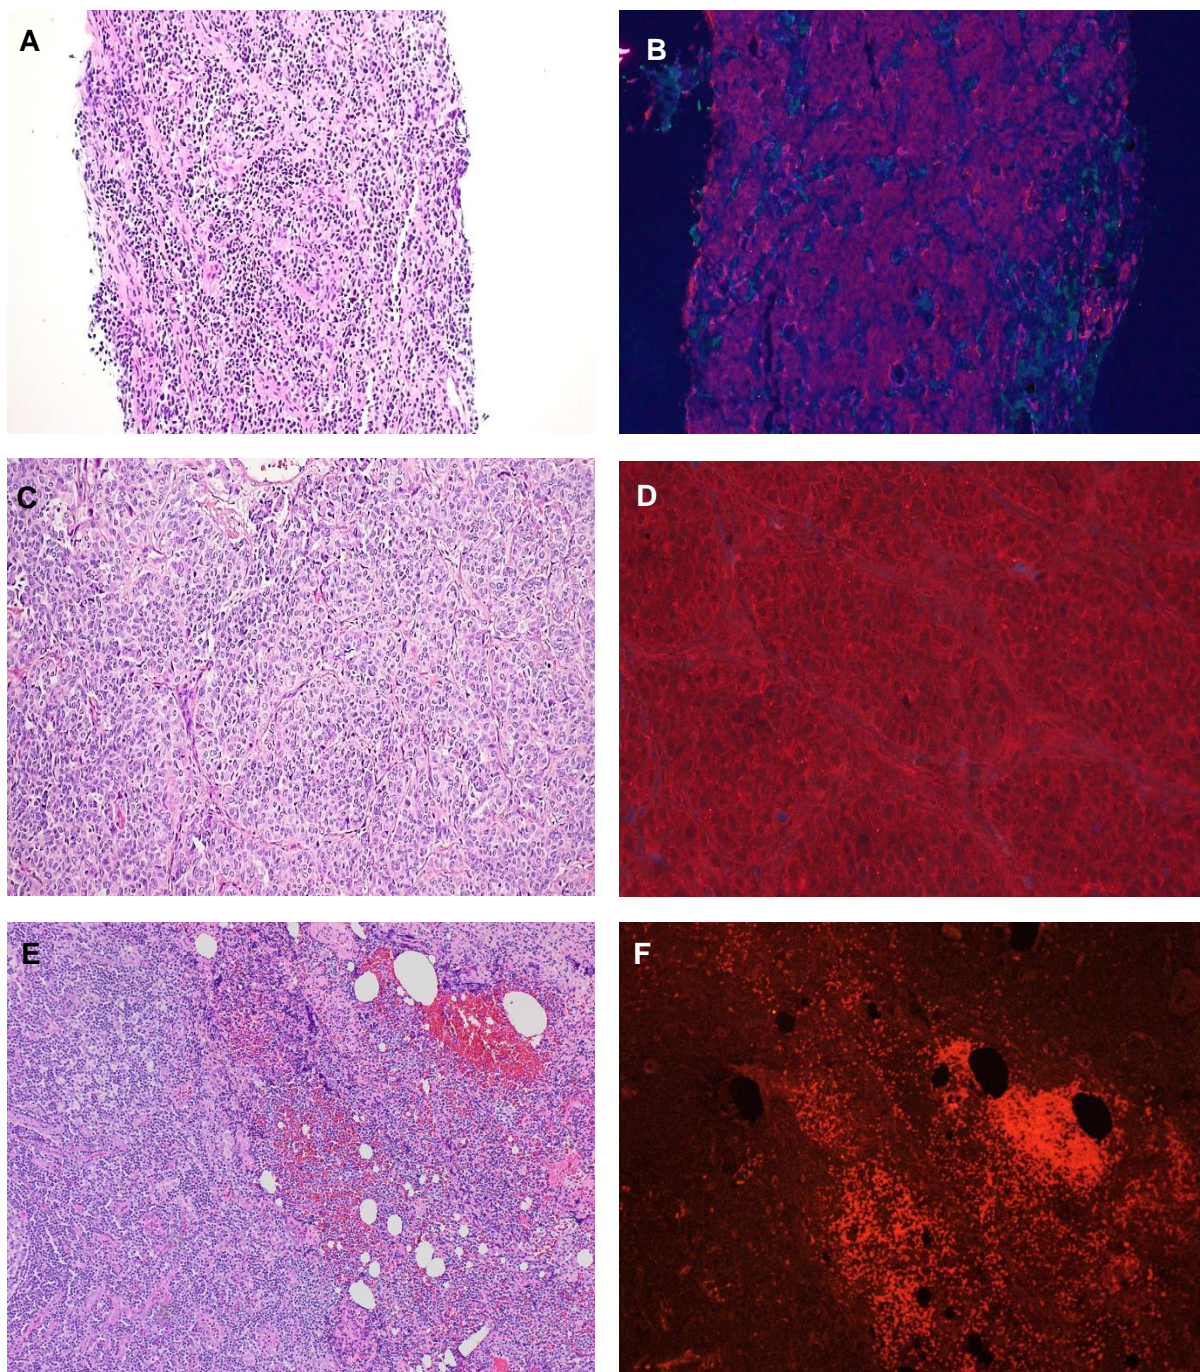

**Supplemental Figure 7.** NELL1 expression in an invasive ductal carcinoma of the breast in a patient with concurrent NELL1-associated MN. A) Hematoxylin & eosin (H & E) stained section of breast biopsy; B) NELL1 positivity in breast biopsy; C) H & E stained section of mastectomy showing invasive ductal carcinoma; D) NELL1 positivity within breast carcinoma, mastectomy specimen; E) H & E stained section of a follicular lymphoma, showing infiltration into fat; F) NELL1 positivity within follicular lymphoma.

Supplemental Figure 8.

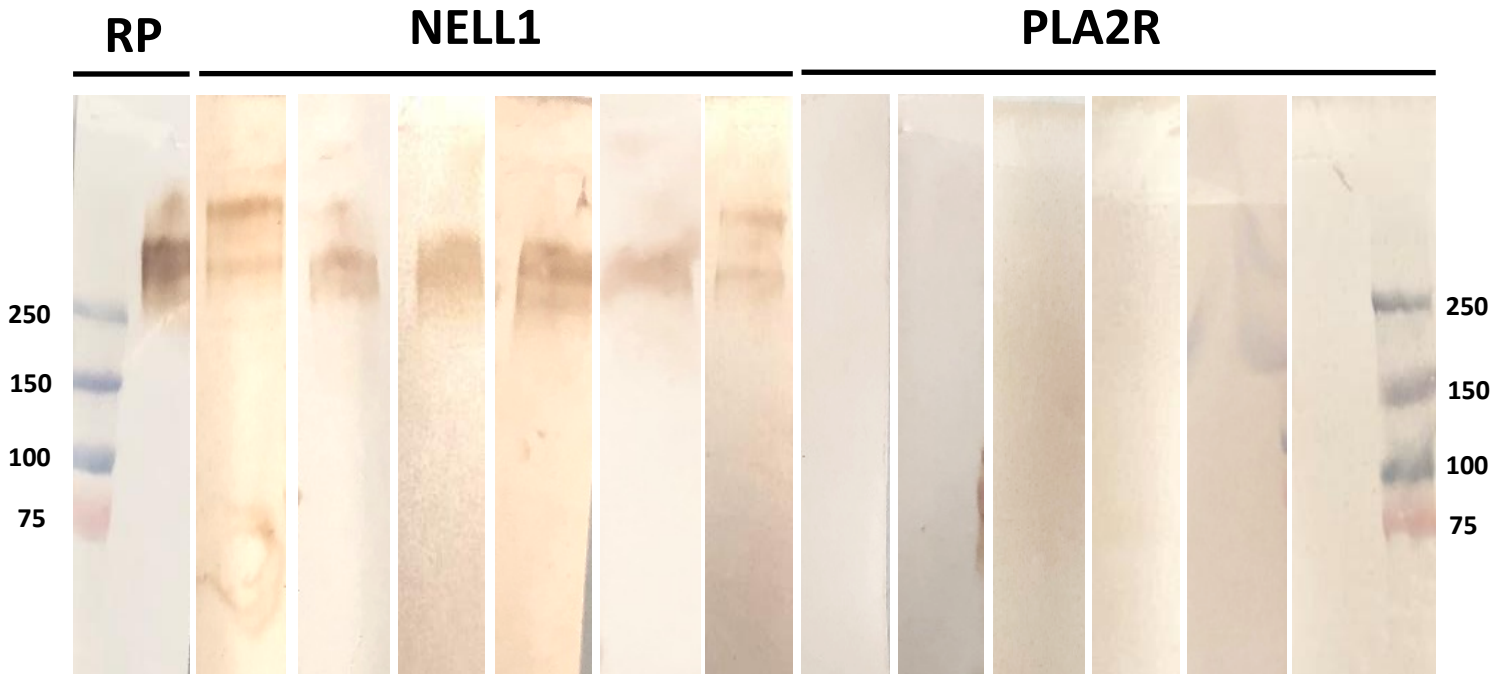

**Supplemental Figure 8.** Serum reactivity to NELL1 recombinant protein in patients with NELL1-associated MN, but not PLA2R+ MN controls. Although the molecular weight was larger than the predicted molecular weight of 140 kDa, it corresponded to the same molecular weight produced when reacting a rabbit polyclonal antibody against the NELL1 recombinant protein (labeled RP). Seroreactivity was only achieved under non-reducing conditions and was not seen under reducing conditions. Representative western blot strips are shown here, from a total of 28 NELL1-associated MN patients and 28 PLA2R positive MN controls studied in total.



**Supplemental Figure 9.** Cohort diagram to show our algorithm for identification of NELL1-associated MN cases in a consecutive case series of 9 months' of idiopathic membranous nephropathy and membranous lupus nephritis cases.

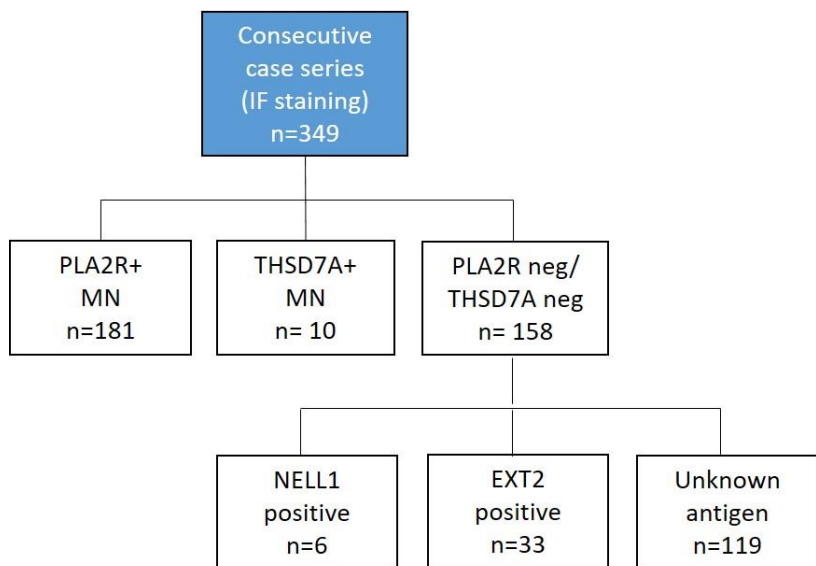

**Supplemental Tables.**

**Supplemental Table 1.**

Prevalence of NELL1, PLA2R, THSD7A, and EXT2 staining in a consecutive case series of kidney biopsies with membranous nephropathy

| Associated disease        | NELL1 positive (n=91) | PLA2R positive (n=181) | THSD7A positive (n=10) | EXT2 positive (n=33) |
|---------------------------|-----------------------|------------------------|------------------------|----------------------|
| Idiopathic                | 54/91 (59%)           | 177/181(97.7%)         | 7/10 (70%)             | 4/33 (12%)           |
| SLE                       | 2/91 (2%)             | 1/181 (1%)             | 3/10 (30%)             | 26/33 (79%)          |
| ANCA                      | 0                     | 0                      | 0                      | 0                    |
| Rheumatoid arthritis      | 1/91 (1%)             | 0                      | 0                      | 0                    |
| Crohn's disease           | 2/91 (2%)             | 0                      | 0                      | 0                    |
| IgG4-related              | 0                     | 0                      | 0                      | 0                    |
| Neoplasia                 | 30/91 (33%)           | 3/181 (1.7%)           | 0                      | 0                    |
| Hepatitis C virus         | 2/91 (2%)             | 0                      | 0                      | 2/33 (6%)            |
| Syphilis                  | 0                     | 0                      | 0                      | 0                    |
| HIV                       | 0                     | 0                      | 0                      | 1/33 (3%)            |
| Graft versus host disease | 0                     | 0                      | 0                      | 0                    |
| Ankylosing spondylitis    | 0                     | 0                      | 0                      | 0                    |

**Supplemental Table 2.** Timing between diagnosis of NELL1-positive MN and malignancy and response to therapy in patients with suspected malignancy-associated MN. Complete remission was defined as <300 mg proteinuria per 24 h, partial remission >50% reduction of proteinuria but >300 mg proteinuria per 24 h, and no remission <50% reduction of proteinuria and/or >3.5 g proteinuria per 24 h.

Abbreviations: TAH-BSO = total abdominal hysterectomy with bilateral salpingo-oophorectomy; TURBT = transurethral resection of bladder tumor; ESKD = end stage kidney disease; SCC = squamous cell carcinoma; ACEI = angiotensin-converting enzyme inhibitor; GIST = gastroesophageal stromal tumor; ARB = angiotensin receptor blocker; CT = computerized tomographic imaging.

| Case | Age | Sex | Cancer type                        | Interval between dx of cancer and MN                   | Change in proteinuria and treatment of malignancy                                                 |
|------|-----|-----|------------------------------------|--------------------------------------------------------|---------------------------------------------------------------------------------------------------|
| 1    | 59  | F   | Ovarian                            | Concurrent                                             | Complete remission after TAH-BSO.                                                                 |
| 2    | 65  | F   | Breast, Lung (metastatic)          | Concurrent                                             | Patient deceased at follow-up                                                                     |
| 3    | 68  | F   | Breast, Lung, Bladder (metastatic) | Concurrent                                             | Complete remission after anastrozole for metastatic breast cancer and TURBT for bladder carcinoma |
| 4    | 64  | M   | Prostate                           | Prostate cancer diagnosed 8 months prior to membranous | Prostatectomy led to partial remission                                                            |
| 5    | 77  | F   | SCC, head & neck                   | Concurrent                                             | Radiation therapy led to partial remission                                                        |
| 6    | 77  | F   | Thyroid                            | Concurrent                                             | Thyroidectomy near time of biopsy, patient progressed to ESKD                                     |
| 7    | 74  | M   | Metastatic melanoma                | Concurrent                                             | Unknown, no clinical follow-up                                                                    |
| 8    | 68  | F   | Lung                               | Concurrent                                             | Patient deceased before follow-up.                                                                |
| 9    | 54  | F   | Cervical                           | Unknown                                                | Complete remission with mycophenolate + prednisone therapy.                                       |
| 10   | 79  | F   | Colon                              | Colon cancer preceded MN diagnosis                     | Patient deceased at follow-up.                                                                    |
| 11   | 71  | M   | Prostate                           | Concurrent, on chemotherapy                            | Partial remission on bicalutamide anti-androgen therapy and ACEI.                                 |
| 12   | 61  | F   | Kidney                             | Concurrent                                             | No remission, but no treatment of underlying tumor.                                               |
| 13   | 63  | F   | Thymoma                            | Thymoma diagnosed 3 months prior to membranous         | Patient lost to follow-up.                                                                        |
| 14   | 71  | F   | Lung, metastatic                   | Concurrent                                             | Patient lost to follow-up.                                                                        |
| 15   | 76  | F   | Skin                               | Unknown                                                | Partial remission.                                                                                |
| 16   | 60  | M   | Bladder and nasopharyngeal         | Concurrent                                             | Unknown, patient lost to follow-up.                                                               |

|    |    |   |                                                      |                                                                                      |                                                                                                                     |
|----|----|---|------------------------------------------------------|--------------------------------------------------------------------------------------|---------------------------------------------------------------------------------------------------------------------|
|    |    |   | carcinoma (two primaries)                            |                                                                                      |                                                                                                                     |
| 17 | 67 | M | Prostate                                             | Prostate carcinoma diagnosed prior to proteinuria                                    | Radiation therapy, as well as immunosuppression prednisone and tacrolimus attempted for treatment, no remission.    |
| 18 | 65 | F | Recurrent breast + renal mass (two primaries)        | Concurrent                                                                           | Mastectomy performed to treat breast cancer, partial remission.                                                     |
| 19 | 67 | M | Prostate, metastatic                                 | Diagnosed 9 years prior, now with lymphadenopathy                                    | No remission                                                                                                        |
| 20 | 85 | F | Breast, metastatic                                   | Concurrent                                                                           | Complete remission                                                                                                  |
| 21 | 78 | M | Prostate                                             | Concurrent                                                                           | No remission, active malignancy and nephrotic syndrome (8 g proteinuria)                                            |
| 22 | 90 | M | Melanoma, GIST (2 primaries)                         | Concurrent with large abdominal GIST                                                 | No remission. Tumor was not resected or treated.                                                                    |
| 23 | 61 | F | Lung cancer                                          | Concurrent                                                                           | Currently receiving chemotherapy and radiation therapy, no remission at follow-up.                                  |
| 24 | 81 | M | Follicular lymphoma                                  | Follicular lymphoma diagnosed 2 years prior to presentation, but not treated         | Surveillance/supportive care for follicular lymphoma, no remission.                                                 |
| 25 | 75 | F | Breast carcinoma, benign brain tumor (two primaries) | Breast carcinoma recognized after membranous nephropathy                             | Patient underwent mastectomy and resection of intracranial mass, as well as ARB therapy, entered complete remission |
| 26 | 68 | M | Skin cancer                                          | Preceded membranous 4 years, resection with orbitotomy and skin resection / grafting | Resection and concurrent immunosuppressive therapy (prednisone + azathioprine), partial remission.                  |
| 27 | 76 | M | Prostate, metastatic                                 | Concurrent                                                                           | Prostate cancer treated with bicalutamide and enzalutamide, ACEI, no remission                                      |
| 28 | 62 | F | Soft tissue tumor, chest wall                        | Concurrent                                                                           | Chest tumor excised (same month as diagnosis of membranous), ACEI, partial remission                                |
| 29 | 65 | M | Kidney cancer                                        | Concurrent, identified on CT at time of biopsy                                       | Complete remission after surgery                                                                                    |
| 30 | 77 | F | Skin cancer (SCC)                                    | Prior to MN diagnosis, but several recurrences                                       | Multiple excisions and partial remission                                                                            |

**Supplemental Table 3.** Treatment and clinical follow-up of patients with NELL1-associated membranous nephropathy. Of the 91 patients in the study, 59 had available clinical follow-up data, 8 were deceased or on dialysis at the time of follow-up, 6 were lost to follow-up, and 18 patients did not have sufficient time since diagnosis for clinical follow-up data to be available. A majority of patients were treated with angiotensin-converting enzyme inhibitor or angiotensin receptor blockade (n=32), and other treatments included calcineurin inhibitors (either cyclosporine or tacrolimus, n=8), cyclophosphamide + prednisone / Ponticelli protocol (n=3), mycophenolate mofetil (n=3), rituximab (n=1), or resection and/or chemoradiation of an underlying malignancy (n=12). The values provided include medians  $\pm$  interquartile range or percentages of total. Abbreviations: Prot = proteinuria, CR = complete remission, PR = partial remission, NR = no remission.

| Treatment                    | n= | Mean follow up (months) | Follow up Cr (median $\pm$ IQR) | Prot (g) (median $\pm$ IQR) | Follow up Prot (g) (median $\pm$ IQR) | % CR        | % PR        | % NR        |
|------------------------------|----|-------------------------|---------------------------------|-----------------------------|---------------------------------------|-------------|-------------|-------------|
| RAS blockade only            | 32 | 8.7                     | 1.1 $\pm$ 0.4                   | 4.9 $\pm$ 4.7               | 1.9 $\pm$ 4.0                         | 9/32 (28%)  | 12/32 (38%) | 11/32 (34%) |
| Calcineurin inhibitor        | 8  | 8.8                     | 1.8 $\pm$ 3.0                   | 10 $\pm$ 9.1                | 6.4 $\pm$ 10.4                        | 2/8 (25%)   | 1/8 (12.5%) | 5/8 (62.5%) |
| Cyclophosphamide             | 3  | 2.7                     | 1.4 (N/A)                       | 9.6 (N/A)                   | 3.9 (N/A)                             | 1/3 (33%)   | 0           | 2/3 (67%)   |
| Mycophenolate +/- prednisone | 3  | 19.3                    | 0.9 (N/A)                       | 8 (N/A)                     | 0.1 (N/A)                             | 2/3 (67%)   | 0           | 1/3 (33%)   |
| Rituximab                    | 1  | 4                       | 1 (N/A)                         | 10 (N/A)                    | 10 (N/A)                              | 0           | 0           | 1 (100%)    |
| Treatment of malignancy *    | 12 | 8.3                     | 1.0 $\pm$ 0.9                   | 5 $\pm$ 7.4                 | 0.1 $\pm$ 2.1                         | 6/12 (50%)  | 3/12 (25%)  | 3/12 (25%)  |
| Total                        | 59 | 10.4                    | 1.1 $\pm$ 0.6                   | 5.4 $\pm$ 6.6               | 1.9 $\pm$ 4.1                         | 20/59 (34%) | 16/59 (27%) | 23/59 (39%) |

\* A total of 14 patients were being treated for an underlying malignancy. 12 of these patients were not receiving concurrent immunosuppression. There is one patient treated for malignancy in the calcineurin inhibitor group as well as the cyclophosphamide group.
